# Supplementary material
Source: PubMed Central journal article supplement (PMC6328333)
Supplement: NIHMS1508200-supplement-15.pdf [file NIHMS1508200-supplement-15.pdf]

## Source codes for image analysis

ImageJ macro for conversion of RGB files to 8 bit, followed by orientationJ

analysis:

```
// "BatchOrientationJ_Distribution"
//
// Questions? Contact Ian Mellis (ian.mellis at gmail.com)
//
// Based on architecture of
https://imagej.nih.gov/ij/macros/BatchProcessFolders.txt
//
// This macro uses pre-specified OrientationJ Distribution settings to batch-
process
// all samples in a single experiment. Expects file structure, e.g.,
//
//   /path/to/EXPERIMENT1/SAMPLE1NAME/SAMPLE1NAME_Snapshot1.tif
//
// When prompted, select the /path/to/EXPERIMENT1/ folder containing all
sample
// folders. This macro will then loop through all samples and process all images
// for each sample using the OrientationJ Distribution function.
//
// Results will be saved in a new folder, e.g.,
//
//
/path/to/EXPERIMENT1/BatchOrientationJ_Distribution_Results_20170101_10h
30m/
//
// Current OrientationJ_Distribution settings, as specified by Aman Kaur:
// - sigma = 3
// - gradient = 4 // i.e., Gaussian
// - energy = on
// - orientation = on
// - coherency = on
// - color-survey = on
// - hue = Orientation
// - sat = Coherency
// - bri = Original-Image
//
// If you want to change OrientationJ settings, edit orientFile() below.

dir = getDirectory("Choose an Experiment Directory ");
getDateAndTime(year, month, dayOfWeek, dayOfMonth, hour, minute, second,
msec)
```

```
timeStamp = ""+year+"-"+(month+1)+"-"+dayOfMonth+"_"+hour+"h"+minute+"m"
resultsDir = dir+"/BatchOrientationJ_Distribution_Results_"+timeStamp+"/"
File.makeDirectory(resultsDir);
```

```
sampCount = 0;
imgCount = 0;
countSamplesAndImages(dir, resultsDir);
processSamples(dir, resultsDir);
print(sampCount+" samples processed");
print(imgCount+" total images processed");
```

```
function countSamplesAndImages(dir, resultsDir) {
    list = getFileList(dir);
    for (i=0; i<list.length; i++) {
        if (endsWith(list[i], "/")) {
            if (!startsWith(list[i], "BatchOrientationJ_Distribution_Results")){
                sampCount++;
                countSamplesAndImages(""+dir+list[i], resultsDir);
            }
        } else {
            if(endsWith(list[i], ".tif")) {
                imgCount++;
            }
        }
    }
}
```

```
function processSamples(dir, resultsDir) {
    list = getFileList(dir);
    for (i=0; i<list.length; i++) {
        if (endsWith(list[i], "/")) {
            if (!startsWith(list[i], "BatchOrientationJ_Distribution_Results")){
                // for a sample folder containing multiple snapshots
                File.makeDirectory(resultsDir+list[i]); // make subfolder in results
                processSamples(""+dir+list[i], resultsDir+list[i]); // call processSamples for
                snapshots in this sample folder
            }
        } else {
            // for a snapshot in a sample folder
            path = dir+list[i]; // full path of snapshot file
            snapName = File.getName(list[i]); // snap basename
            snapBase = replace(snapName, ".tif", "");
            orientFile(path, snapBase, resultsDir); // call orientFile on snapshot
        }
    }
}
```

```

function orientFile(path, snapName, resultsDir) {
  if (endsWith(path, ".tif")) {
    thisSampsResultsFile = resultsDir+snapName+"_distribution.xls";
    oriCall = "log=0.0 tensor=3.0 gradient=4 min-coherency=0.0 min-energy=0.0
harris-index=on color-survey=on s-distribution=on hue=Orientation
sat=Coherency bri=Original-Image filename=""+"+thisSampsResultsFile+""";
    open(path);
    run("8-bit");
    run("OrientationJ Distribution", oriCall);
    run("Close All");
  }
}

```

R code for normalization of images obtained from orientation analysis:

```

#call libraries
library(dplyr)
library(xlsx)
library(readxl)

#working directory to import/export files (keep setting as needed)
setwd("path name here")
getwd()

#import files
dat <- read.delim("example.xls")

# Copy the code into the console
a <- dat[which(dat$Y == max(dat$Y)),] # get the x and Y values for row with max
Y
print a # if a=0, the code will not work; simply
export the file as xlsx
af <- as.numeric(a$X) # get the value of X with largest Y in a
numeric class matrix
Xm <- dat[,1] # extract column X
Ym <- dat[,2] # extract column Y
Yf <- data.frame(Ym) # convert column Y values to data frame
to combine with X later
Xm2 <- Xm-af # modify Xm to subtract mode value
Xm2m <- matrix(Xm2) # convert Xm to matrix

if (af>0) {
  #Part 1 --> #if af>0,

```

```

Xm3 <- Xm2m[1:af,]
Xm4 <- Xm3+180 # vector for manipulating mode
with 180 values
Xm4m <- matrix(Xm4) # convert Xm4 from integer to matrix
values
Xf <- replace(Xm2m,1:af, Xm4m) # new manipulated values for
Column X
Xfm <- data.frame(Xf) # convert Xf from matrix to data.frame for
combining columns
} else {
#Part 2 --> if af<0, use -180
negaf<- 181+af
Xm3 <- Xm2m[negaf:180,]
Xm4 <- Xm3-180 # vector for manipulating mode with 180
values
Xm4m <- matrix(Xm4) # convert Xm4 from integer to matrix
values
Xf <- replace(Xm2m,negaf:180, Xm4m) # new manipulated values for
Column X
Xfm <- data.frame(Xf) # convert Xf from matrix to data.frame for
combining columns
}

```

#Combining columns and plotting here

```

filenew<- bind_cols(data.frame(Xfm), data.frame(Yf)) # combine columns of X and Y
to make a new data frame

```

```

cname<- c("X", "Y") # make vector with column
names
colnames(filenew) <- cname # tag column names to
matrix
filef <- filenew[order(filenew$X),]
plot(filef) # a. plot data file

```

#rename file name as desired for output and view table if desired

```

write.xlsx(filef, "example.xlsx") # export results to excel

```

#combine files to form a master file with all reading per sample

```

filenames <- list.files(pattern = ".xlsx") # prepares a list of all
filenames with the pattern in them
comb <- as.data.frame(lapply(filenames, read_excel)) # combines files found in
filenames list as a data frame
View(comb) # shows the combined data
frame in the RStudio
fulldata <- comb[,c(2,3,6,9,12,15,18,21,24,27)] # extracts desired columns
from the data frame

```

```
write.xlsx(fulldata, "GM01948_AG11726aged.xlsx") # export final table to excel
```
