# Supplementary material
Source: PubMed Central journal article supplement (PMC6328333)

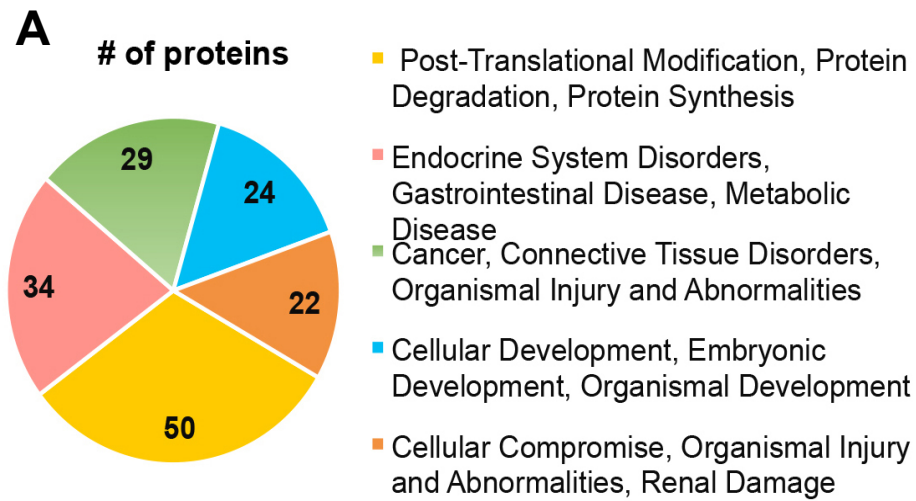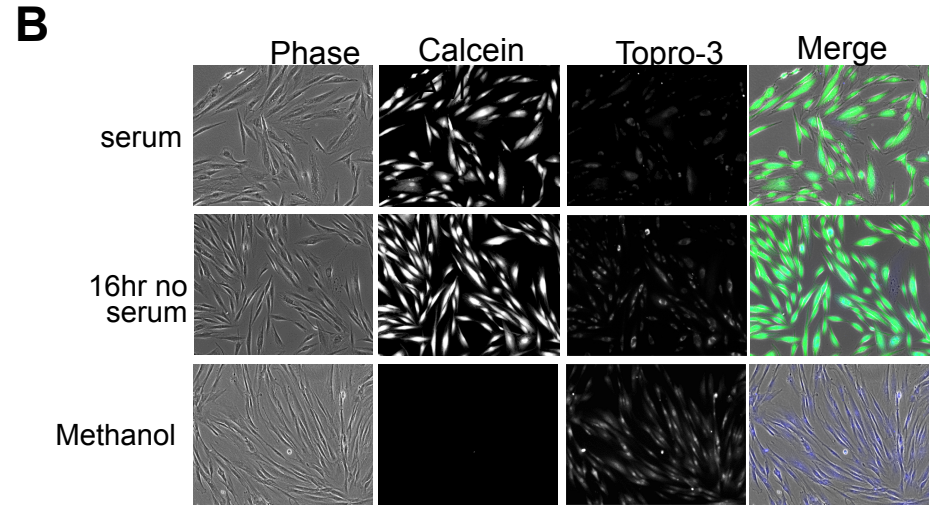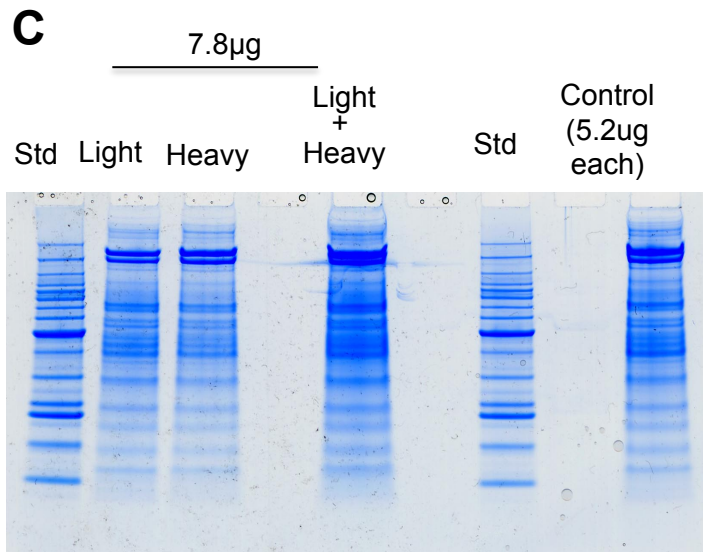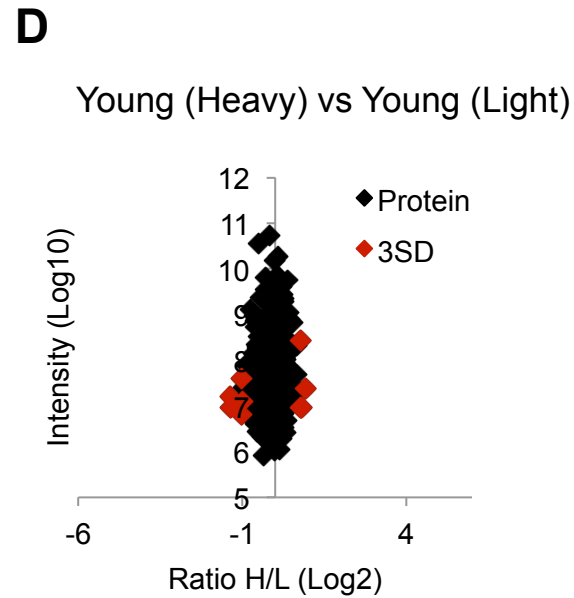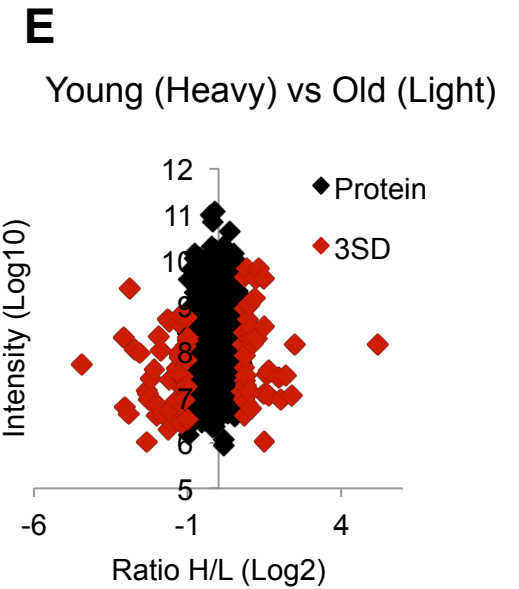

**Figure S1**

**A**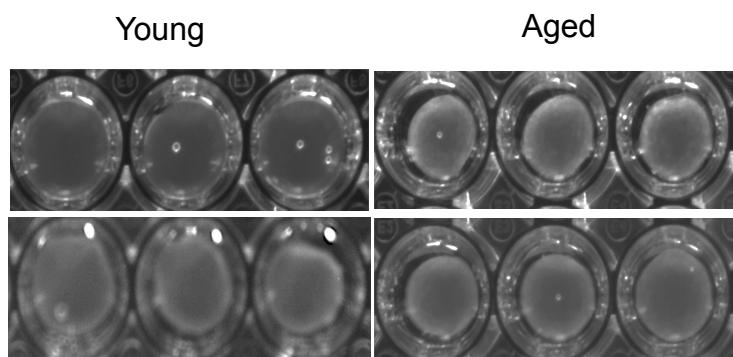**C**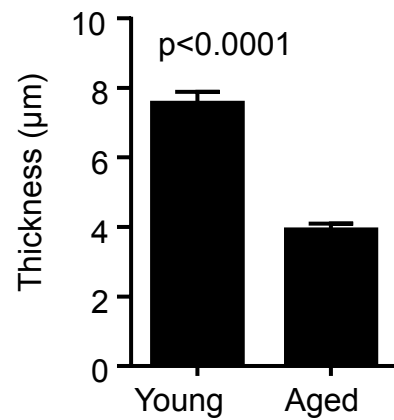**B**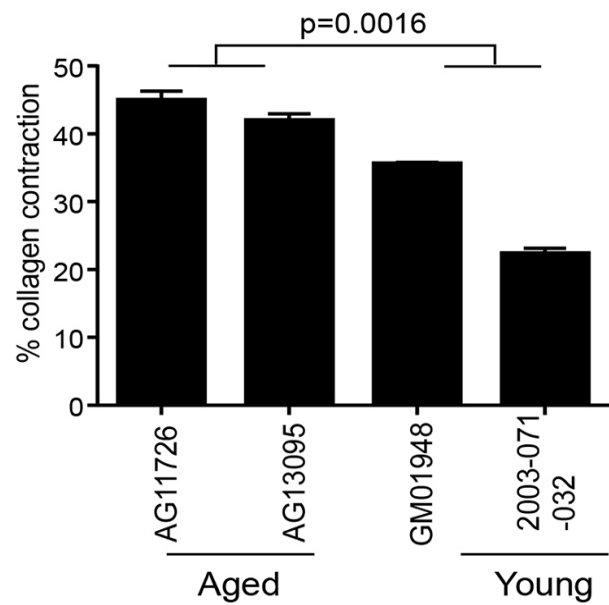**D**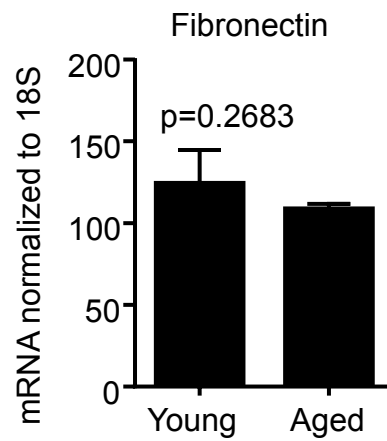**Figure S2**

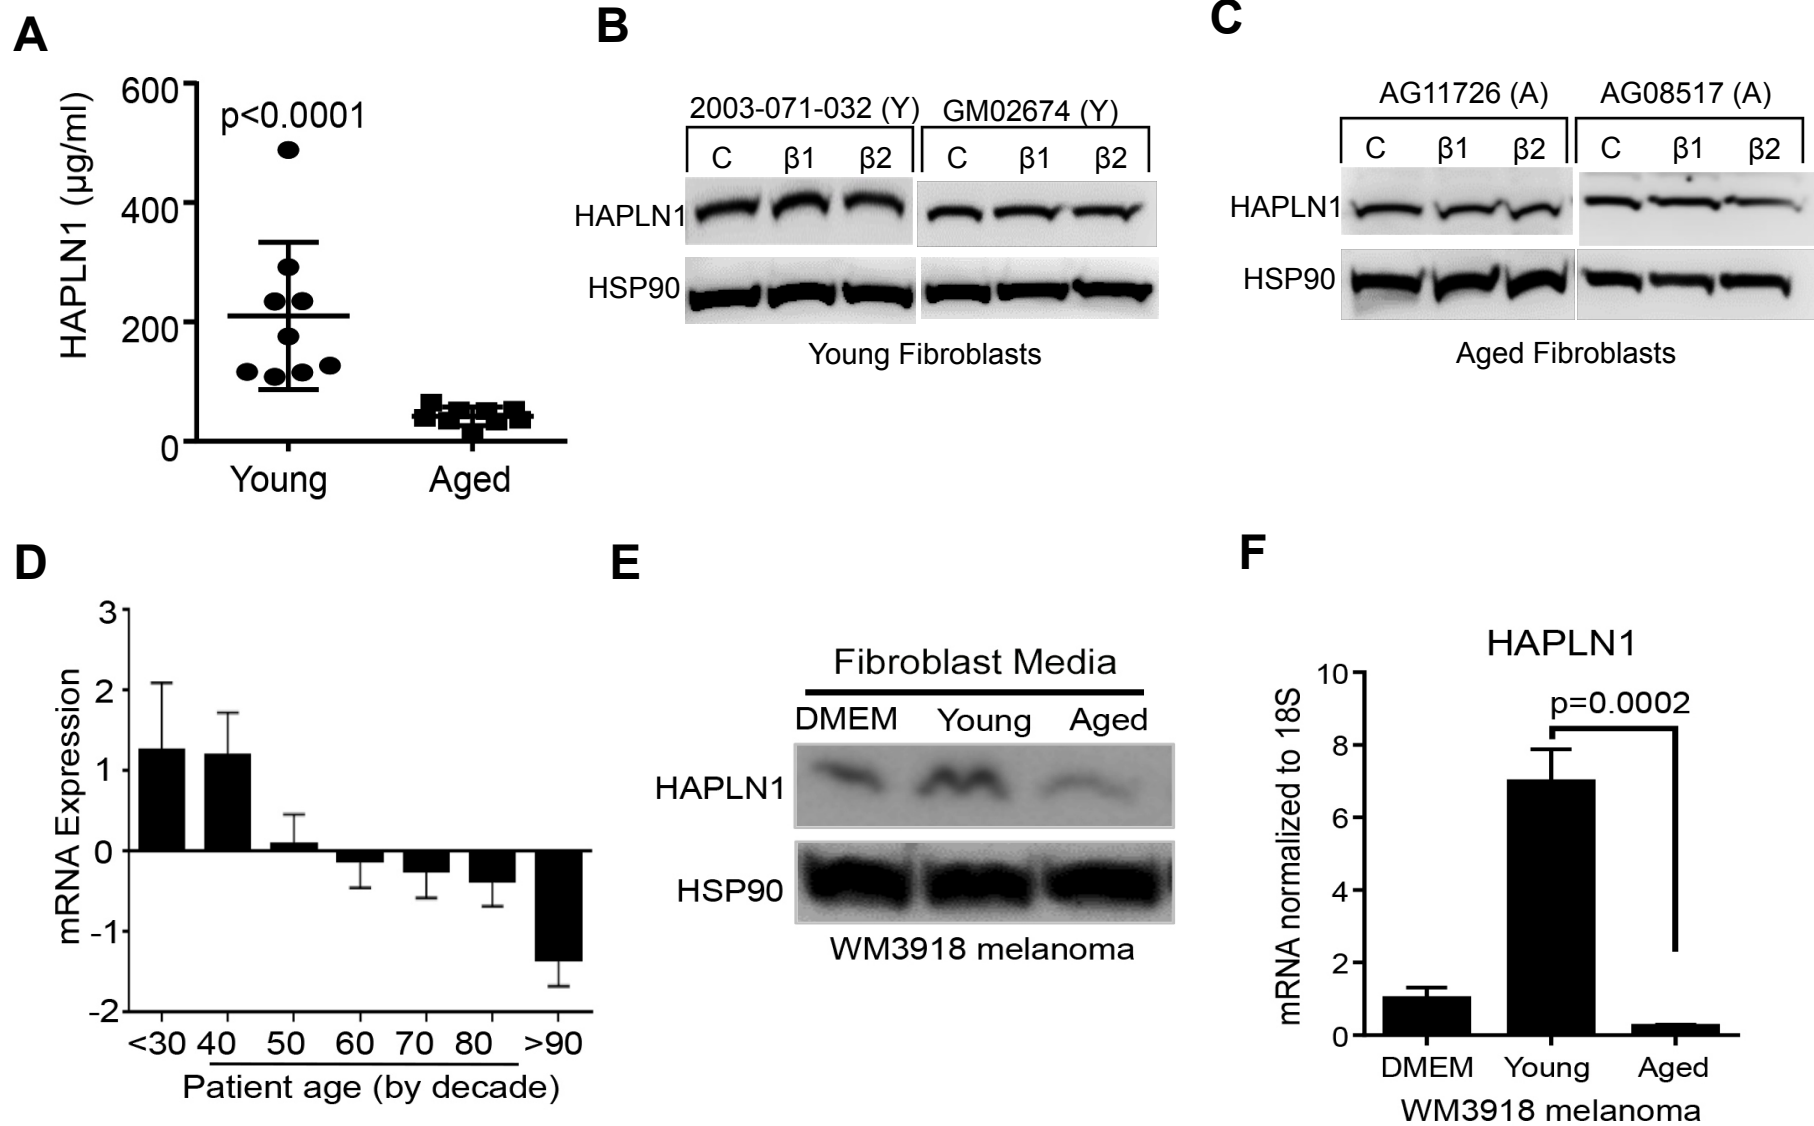

**Figure S3**

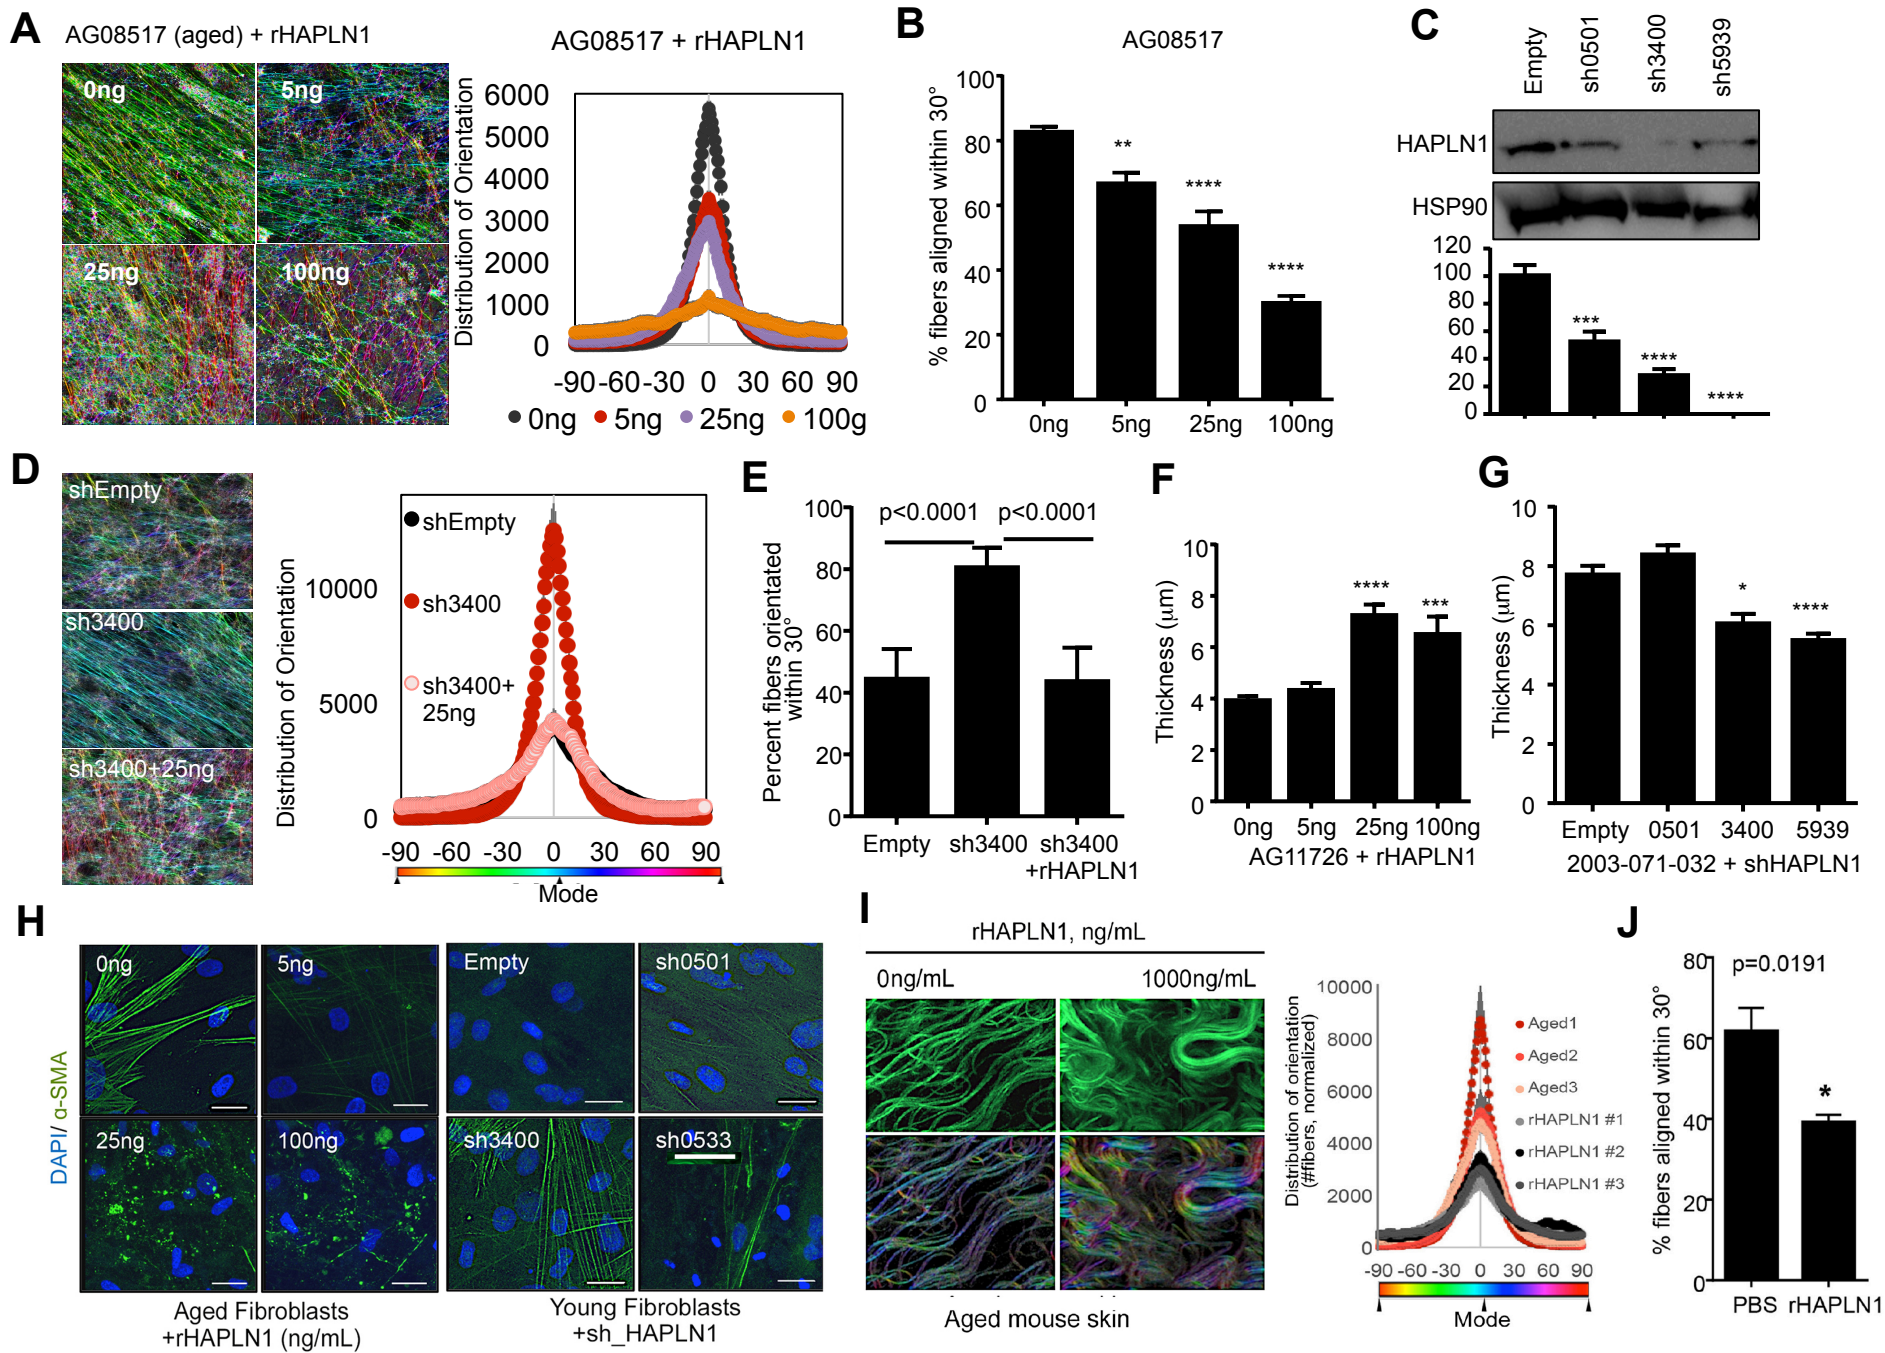

**Figure S4**

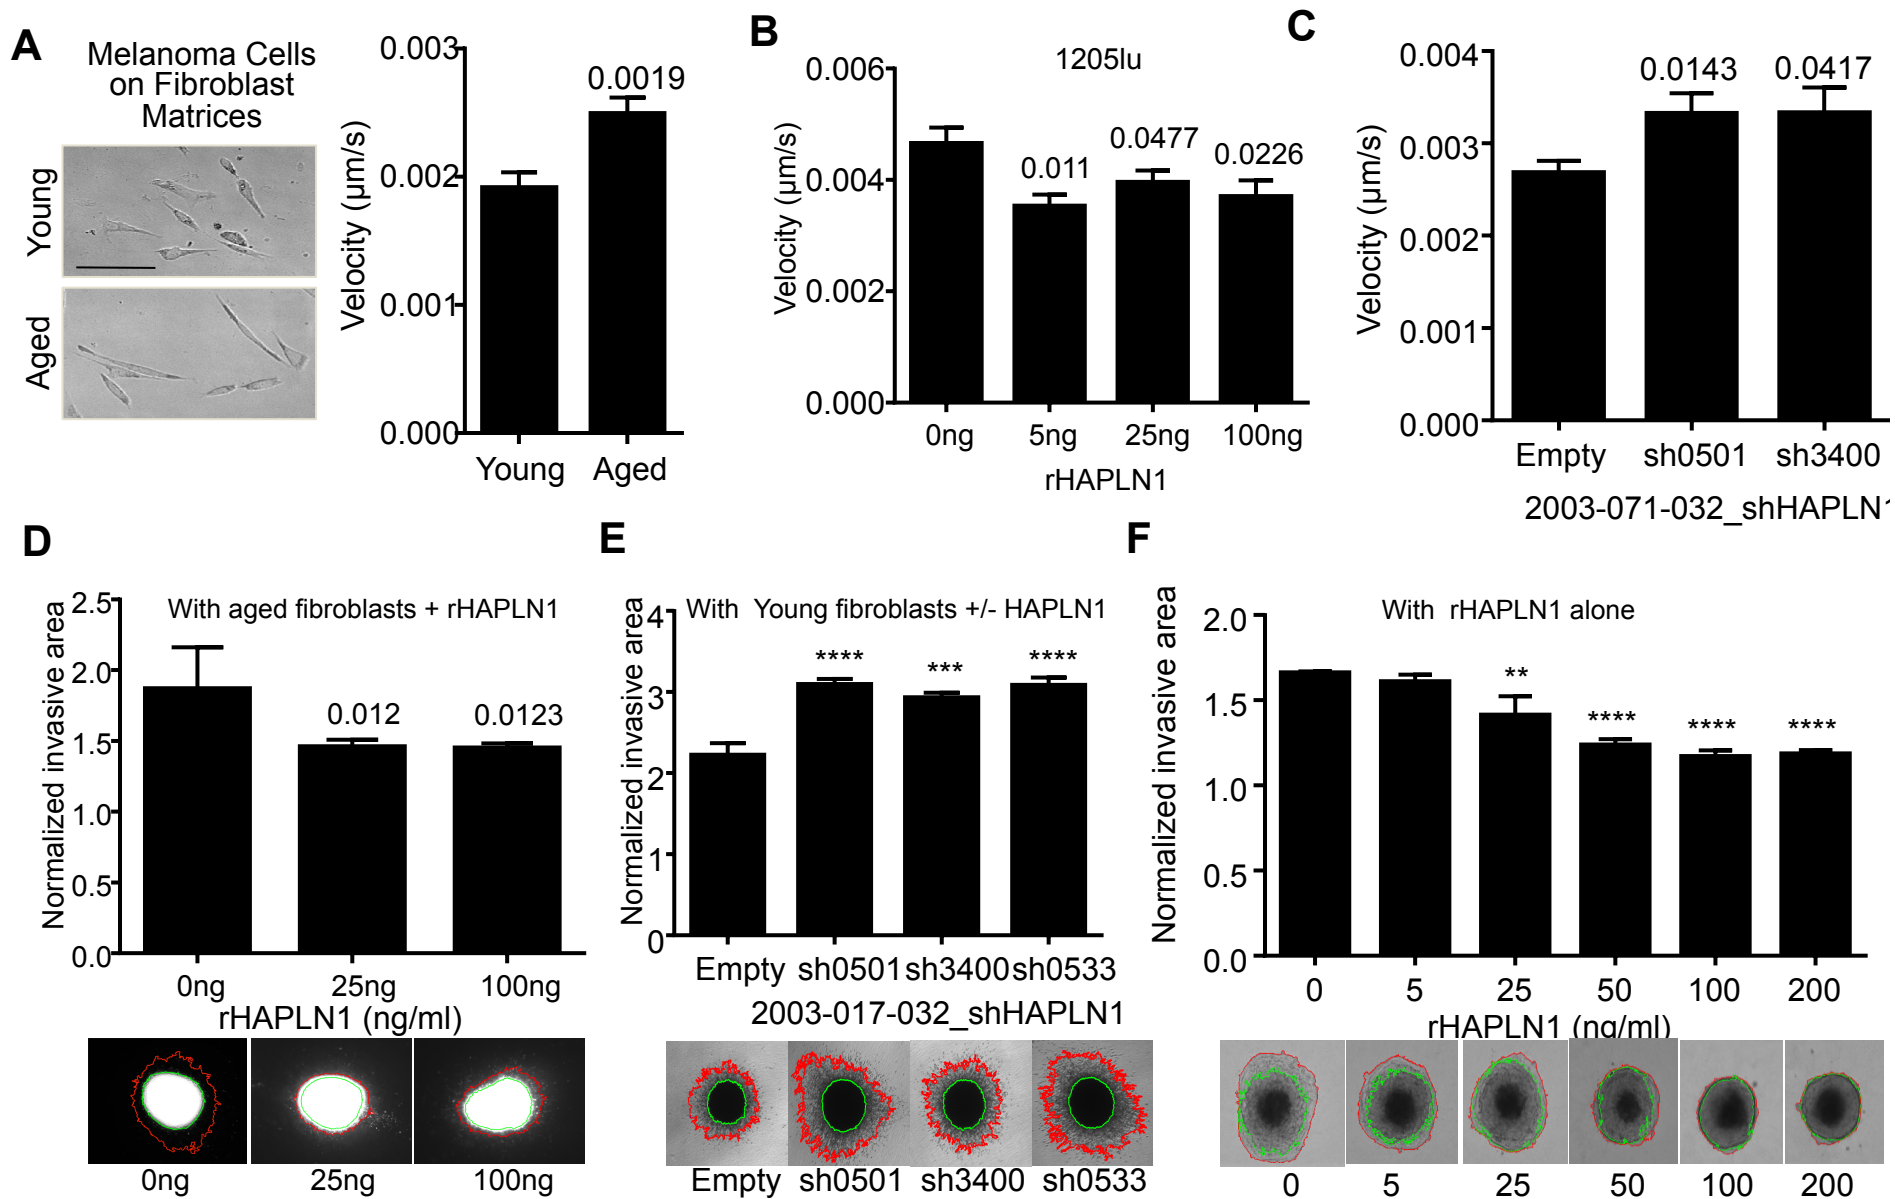

**Figure S5**

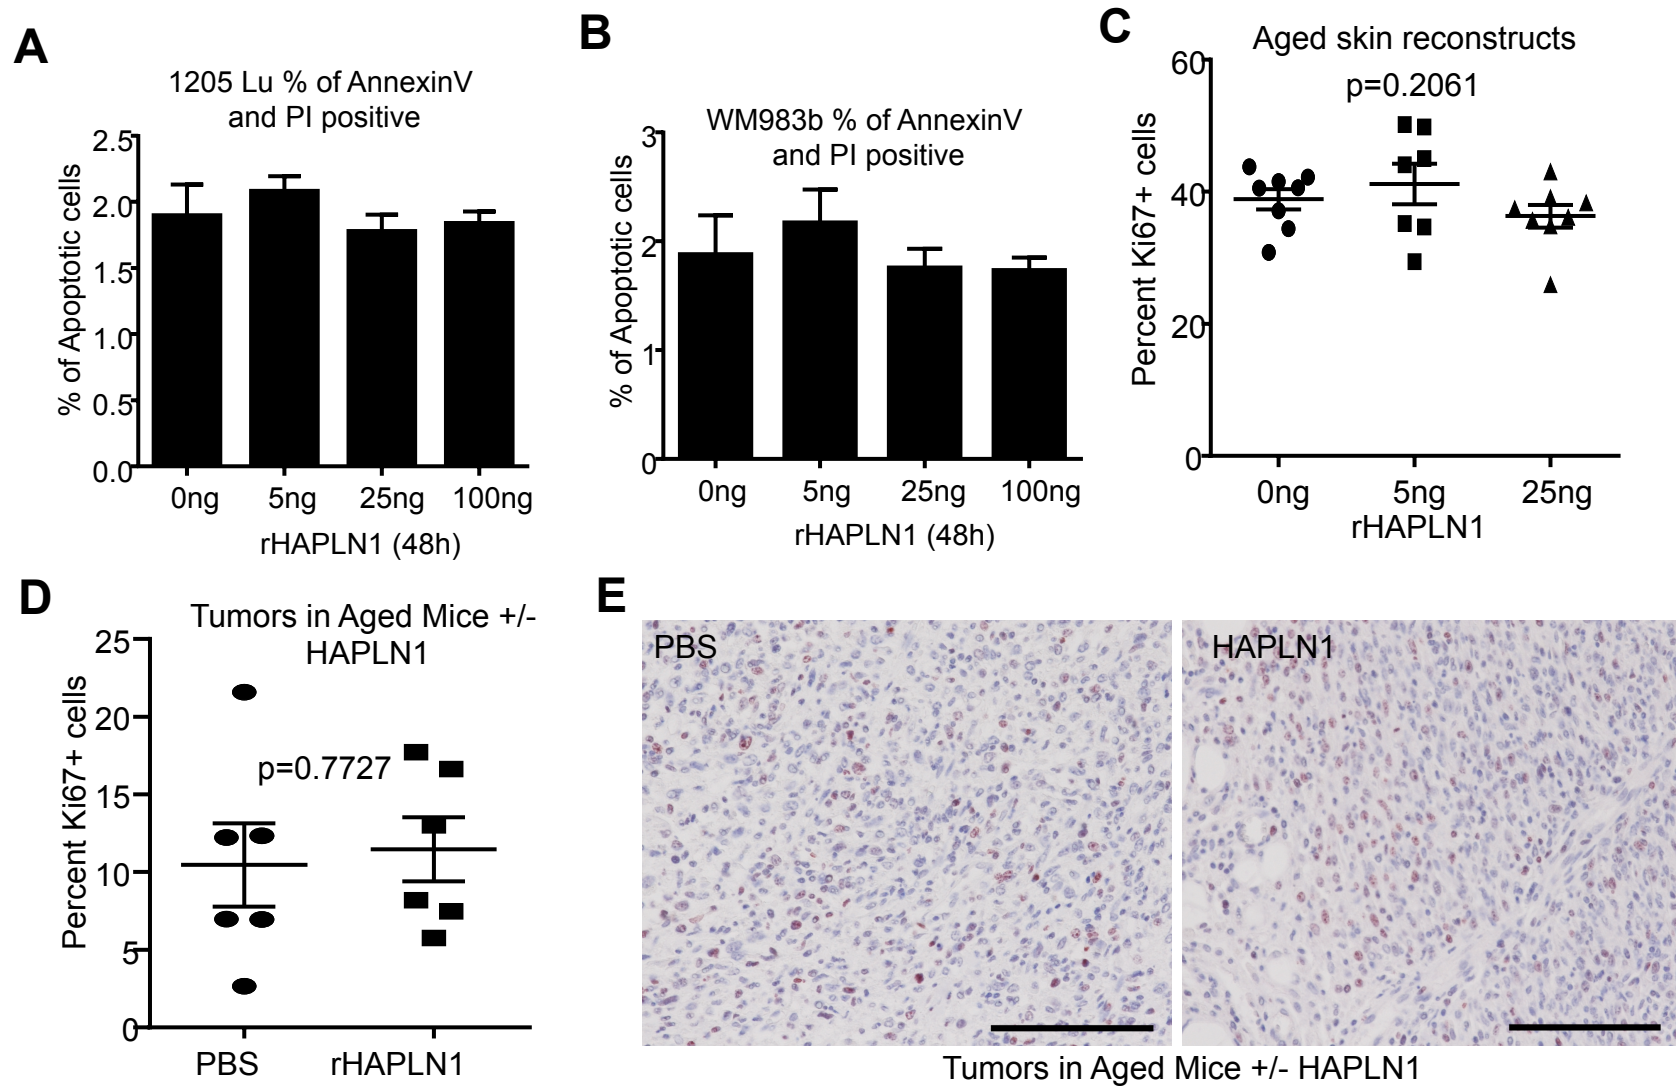

**Figure S6**

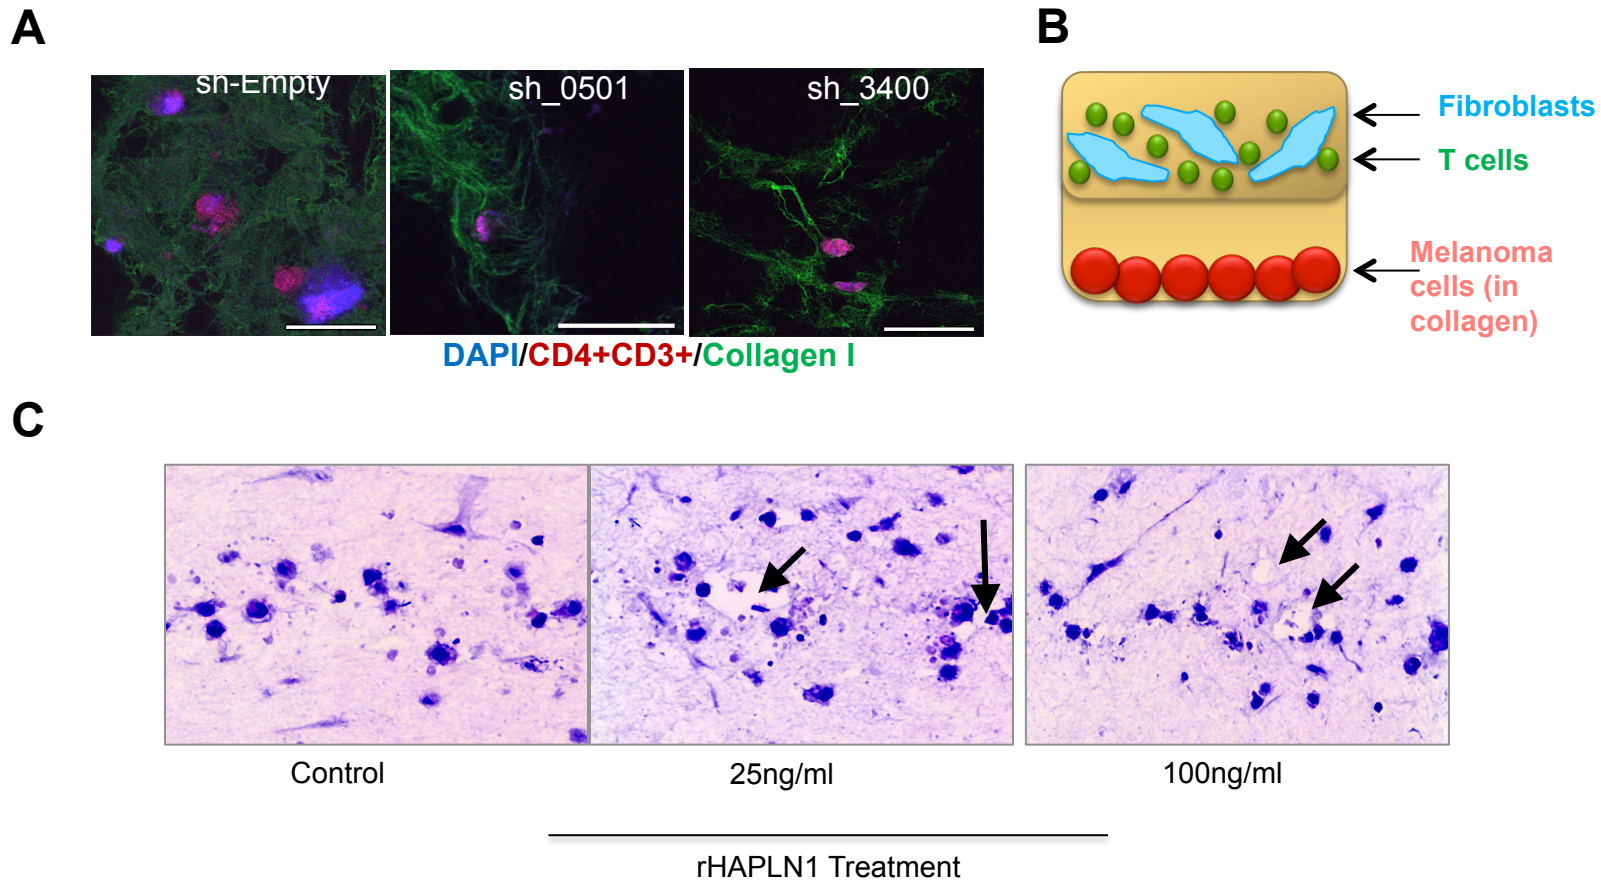

**Figure S7**

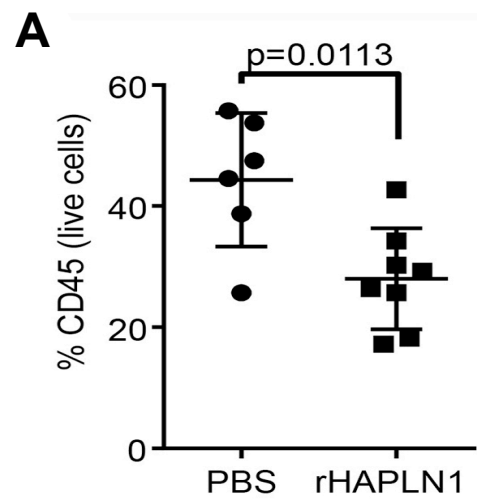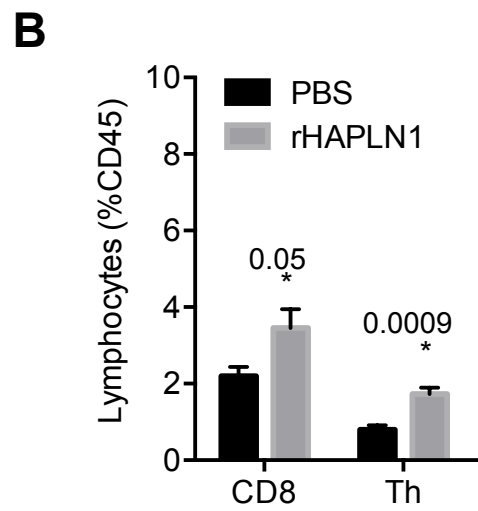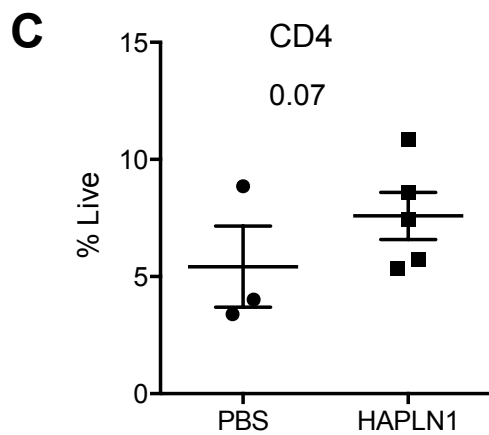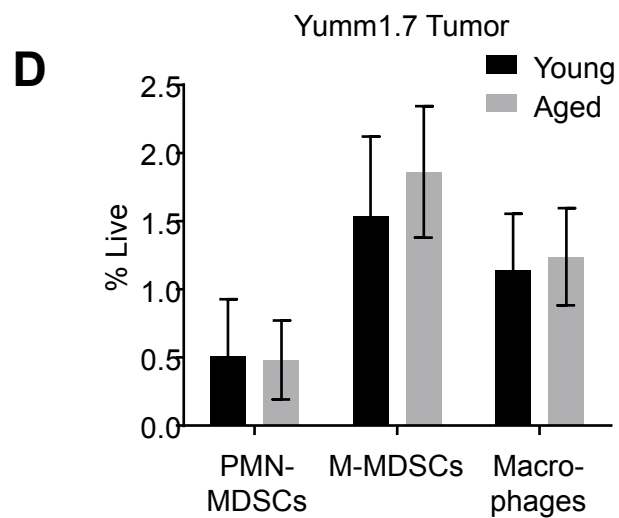

**Figure S8**

Supplement: NIHMS1508200-supplement-2.pdf [file NIHMS1508200-supplement-2.pdf]
